# Supplementary material
Source: MDPI journal article supplement (https://www.mdpi.com/2073-4395/14/1/201)
Supplement: s1 [file s1]

**Table S1: List of 50 spring wheat genotypes used in this study**

| Genotypes       | Year of Release | Brief Characteristics                               |
|-----------------|-----------------|-----------------------------------------------------|
| Saddiq-21       | 2021            | New, High yielding for irrigated areas              |
| Pari-73         | 1973            | Obsolete, old variety                               |
| Pak-81          | 1981            | High yielding, old variety                          |
| C-250           | 1955            | Cross of landraces, pre-green revolution            |
| Dilkash         | 2021            | Current wheat variety. High yielding rust resistant |
| MH-21           | 2021            | Current wheat variety. High yielding rust resistant |
| Nawab-21        | 2021            | Current wheat variety. High yielding rust resistant |
| Punjab-76       | 1976            | Old variety for irrigated areas of Punjab           |
| Anaj-2017       | 2017            | High yielding what variety for irrigated area       |
| Fakhr-e-Bhakkar | 2016            | Drought tolerant                                    |
| Barani-17       | 2017            | Drought tolerant for rain fed area                  |
| Bhakkar star    | 2015            | High yielding, drought tolerant                     |
| Markaz-2019     | 2019            | High yielding for Arid area                         |
| NIFA- Awaz      | 2019            | High yielding for KPK                               |
| Faheem-19       | 2019            |                                                     |
| Ghazi-2019      | 2019            | High yielding, Heat resistance, Drought tolerant    |
| NIA-Zakheera    | 2020            |                                                     |
| NIA-Shaheen     | 2017            | High yielding, Salt, Drought tolerant               |
| Akber-19        | 2019            | High yielding, Heat resistance, Drought tolerant    |
| Gulzar-19       | 2019            | High yielding, Heat resistance, Drought tolerant    |
| Pirsbak-19      | 2019            | High yielding, Heat resistance, Drought tolerant    |
| Morocco         | Old landrace    | Landrace, rut spreader                              |
| Aghaz           | 2019            | Drought tolerant                                    |
| Khoshn          | --              | --                                                  |
| AZRC            | --              | --                                                  |
| Umeed-e-Khas    | --              | --                                                  |
| WL 711          | --              | High yielding                                       |
| Pirsbak-13      | 2013            | Obsolete. Rust susceptible                          |
| Hamal-Faqir     | 2011            | Obsolete. Rust susceptible                          |
| Pakistan-2013   | 2013            | Obsolete. Rust susceptible                          |

|                |      |                                                            |
|----------------|------|------------------------------------------------------------|
| NIFA-Lilma     |      | Obsolete. Rust susceptible                                 |
| Galaxy-2013    | 2013 | High yielding, salt and drought tolerant. Rust susceptible |
| Shalakot-13    | 2013 | Obsolete. Rust susceptible                                 |
| Umeed-2014     | 2014 | Obsolete. Rust susceptible                                 |
| Pakhtunkhwa-15 | 2015 | Obsolete. Rust susceptible                                 |
| Pirsbak-15     | 2015 | Obsolete. Rust susceptible                                 |
| Ujala-15       | 2015 | High yielding                                              |
| IBGE-Ghaneemat | 2016 | Drought tolerant for rainfed area                          |
| NIFA-Insaf     | 2015 | Obsolete. Rust susceptible                                 |
| Sindhu-16      | 2016 | Obsolete. Rust susceptible                                 |
| Zincol         | 2016 | High yielding. High in Zn                                  |
| Boroloug-16    | 2016 | High yielding, current cultivar                            |
| NIFA-Aman      | 2017 | High yielding, current cultivar                            |
| Gold-16        | 2016 | High yielding, current cultivar                            |
| Johar-16       | 2016 | Obsolete wheat variety                                     |
| Ihsan-16       | 2016 | Obsolete wheat variety                                     |
| Fatehjang-16   | 2016 | Obsolete wheat variety                                     |
| NN-Gandum1     | 2016 | Obsolete wheat variety                                     |
| Wardan-17      | 2017 | Obsolete wheat variety                                     |
| Pasina17       | 2017 | Obsolete wheat variety                                     |

Table S2: Mean pollen viability (%) at 0D, 1D, 3D and 6D

| S.NO | Genotypes       | 0D      |         |         | 1D      |         |         | 3D      |         |         | 6D      |         |         |
|------|-----------------|---------|---------|---------|---------|---------|---------|---------|---------|---------|---------|---------|---------|
|      |                 | 22°C    | 4°C     | -20°C   |
| 1    | Saddiq-21       | 90      | 96.3333 | 89      | 58      | 70.6667 | 43.6667 | 45.6667 | 56.3333 | 44      | 33.3333 | 42.3333 | 32.6667 |
| 2    | Pari-73         | 88.6667 | 96.6667 | 86.6667 | 56      | 79.4    | 42.6667 | 39.6667 | 53      | 37.3333 | 0       | 44.3333 | 30      |
| 3    | Pak-81          | 76.6667 | 95.3333 | 74.6667 | 56.3333 | 67.6667 | 46      | 45.3333 | 53.3333 | 41.6667 | 35.6667 | 41.3333 | 32.6667 |
| 4    | C-250           | 81.3333 | 99      | 83.3333 | 55      | 65.3333 | 45.6667 | 41      | 56.6667 | 34.3333 | 35      | 43.3333 | 2.56    |
| 5    | Dilkash         | 99      | 98.6667 | 95.6667 | 58.6667 | 66.3333 | 55      | 46.3333 | 51      | 46      | 33      | 38      | 32.6667 |
| 6    | MH-21           | 82      | 99      | 82      | 56.3333 | 68.6667 | 52      | 40.6667 | 54.6667 | 40.3333 | 35      | 44.3333 | 35      |
| 7    | Nawab-21        | 81      | 88      | 80      | 58      | 71.6667 | 56.3333 | 41.6667 | 55      | 41      | 35.3333 | 45.3333 | 35.3333 |
| 8    | Punjab-76       | 82.6667 | 99      | 82.3333 | 59      | 73.3333 | 53      | 38.6667 | 54      | 36.6667 | 5.7     | 43.3333 | 32      |
| 9    | Anaj-2017       | 87.6667 | 86.3333 | 86.6667 | 56      | 71.3333 | 57.6667 | 43      | 52.6667 | 45      | 32      | 45.3333 | 21      |
| 10   | Fakhr-e-Bhakkar | 84.3333 | 99      | 82.3333 | 59.3333 | 68      | 56.6667 | 39      | 52      | 36.3333 | 32.6667 | 41.6667 | 32.6667 |
| 11   | Barani-17       | 85      | 88.6667 | 84.6667 | 55.6667 | 66.6667 | 55      | 40.3333 | 54      | 37.3333 | 33.3333 | 40.6667 | 33.3333 |
| 12   | Bhakkar star    | 99      | 97.3333 | 98.3333 | 59.6667 | 68      | 56.6667 | 40.3333 | 54.6667 | 37      | 36      | 40.3333 | 36      |
| 13   | Markaz-2019     | 90.3333 | 94.6667 | 89.3333 | 59.6667 | 68.3333 | 55      | 45.3333 | 55      | 43.6667 | 36      | 44.3333 | 36      |
| 14   | NIFA- Awaz      | 78      | 99      | 77      | 55.6667 | 68.6667 | 52      | 44.6667 | 49.6667 | 43.3333 | 35.3333 | 42      | 23      |
| 15   | Faheem-19       | 82      | 97.3333 | 81.3333 | 57      | 66.3333 | 54.3333 | 46.6667 | 54.3333 | 45.6667 | 33.3333 | 37.6667 | 26      |
| 16   | Ghazi-2019      | 76.6667 | 99      | 76.6667 | 54      | 67.3333 | 58      | 42.3333 | 52      | 35      | 34      | 40.3333 | 34      |
| 17   | NIA-Zakheera    | 73.6667 | 95.3333 | 73.6667 | 55.3333 | 68.3333 | 54.6667 | 45.3333 | 54.3333 | 44.6667 | 32.3333 | 44.6667 | 32.3333 |
| 18   | NIA-Shaheen     | 75.3333 | 99      | 74.6667 | 55.6667 | 71      | 44      | 41      | 57      | 40      | 31.6667 | 44.6667 | 31.6667 |
| 19   | Akber-19        | 99      | 96.3333 | 98.3333 | 58.6667 | 71.3333 | 56.3333 | 46.3333 | 50      | 44.6667 | 31.6667 | 47.3333 | 31.6667 |
| 20   | Gulzar-19       | 75.3333 | 99      | 73.6667 | 53.6667 | 70.3333 | 52.6667 | 41.6667 | 51.6667 | 41.3333 | 31      | 46.3333 | 28.6667 |
| 21   | Pirsbak-19      | 99.3333 | 97.3333 | 98.3333 | 58.6667 | 69.3333 | 57      | 39.6667 | 54.6667 | 38      | 34.6667 | 40.6667 | 34.6667 |
| 22   | Morocco         | 88.6667 | 99      | 88.3333 | 55      | 66.3333 | 55      | 40.6667 | 52.6667 | 36.6667 | 36.3333 | 41.6667 | 36.3333 |
| 23   | agaaz           | 99      | 96.3333 | 98.3333 | 53.3333 | 69      | 54      | 43      | 54.3333 | 43.3333 | 34.3333 | 38.6667 | 34.3333 |
| 24   | Khoshn          | 87      | 99      | 86      | 57.3333 | 68      | 56.3333 | 43      | 53      | 43.3333 | 34.6667 | 45      | 26.3333 |

|    |                |         |         |         |         |         |         |         |         |         |         |         |         |
|----|----------------|---------|---------|---------|---------|---------|---------|---------|---------|---------|---------|---------|---------|
| 25 | AZRC           | 99      | 97      | 98.3333 | 55.6667 | 68      | 59      | 43      | 54.6667 | 37.3333 | 34      | 43.6667 | 34      |
| 26 | Umeed-e-Khas   | 83.6667 | 99      | 82.6667 | 56.6667 | 67.3333 | 54      | 44.6667 | 55.6667 | 35.6667 | 33.6667 | 38.6667 | 28      |
| 27 | WL 711         | 71      | 96.6667 | 72.6667 | 56.6667 | 66.6667 | 57      | 42.3333 | 52      | 41.3333 | 33.3333 | 46      | 33.3333 |
| 28 | Pirsbak-13     | 97      | 92      | 96      | 56.3333 | 67.3333 | 58      | 42.3333 | 55.6667 | 44      | 34.6667 | 45.3333 | 34.6667 |
| 29 | Hamal-Faqir    | 82.6667 | 87.3333 | 85      | 56      | 69.3333 | 54.6667 | 41.3333 | 50.3333 | 39      | 34.3333 | 44.6667 | 34.3333 |
| 30 | Pakistan-2013  | 94      | 99      | 94      | 56.6667 | 71      | 56.6667 | 40.3333 | 49.3333 | 37      | 31      | 46.6667 | 31      |
| 31 | NIFA-Lilma     | 82.6667 | 88.3333 | 82.6667 | 58      | 70.6667 | 43.6667 | 42.3333 | 56.3333 | 44.6667 | 33.3333 | 39      | 33.3333 |
| 32 | Galaxy-2013    | 89.6667 | 98.3333 | 89.6667 | 55      | 70.3333 | 56      | 44.3333 | 53.3333 | 42.6667 | 33      | 45.3333 | 33      |
| 33 | Shalakot-13    | 99      | 94.3333 | 98.3333 | 58.6667 | 70      | 54.3333 | 46.6667 | 48.3333 | 45.6667 | 34.3333 | 41      | 34.3333 |
| 34 | Umeed-2014     | 99      | 99      | 95.6667 | 55      | 68.3333 | 58      | 43.3333 | 58      | 37.3333 | 35.3333 | 46.3333 | 33      |
| 35 | Pakhtunkhwa-15 | 99.3333 | 98.6667 | 95.6667 | 53.6667 | 67      | 54.3333 | 45      | 57.6667 | 47      | 34      | 41.6667 | 26      |
| 36 | Pirsbak-15     | 81.6667 | 99      | 81.6667 | 59.3333 | 68      | 58      | 41.6667 | 52.6667 | 36.6667 | 33.6667 | 44.6667 | 35      |
| 37 | Ujala-15       | 71      | 98.6667 | 71      | 56.3333 | 67.3333 | 54.6667 | 40.6667 | 56.6667 | 42.6667 | 33.3333 | 48.6667 | 33      |
| 38 | IBGE-Ghaneemat | 89.6667 | 99.3333 | 89.3333 | 57      | 66.6667 | 41      | 40.3333 | 51.6667 | 44      | 34.6667 | 45      | 35      |
| 39 | NIFA-Insaf     | 89.6667 | 96.3333 | 89      | 56.6667 | 67      | 56.3333 | 44.3333 | 53.3333 | 46.6667 | 34.3333 | 43      | 35.3333 |
| 40 | Sindhu-16      | 86.6667 | 99      | 85      | 56.6667 | 68.3333 | 54.3333 | 45.3333 | 54.3333 | 44      | 32      | 45.6667 | 32      |
| 41 | Zincol         | 99      | 100     | 98.3333 | 53.3333 | 69.3333 | 57.6667 | 41.3333 | 52      | 44      | 36      | 47      | 32      |
| 42 | Boroloug-16    | 78      | 99      | 78      | 56      | 70.6667 | 54.3333 | 40.3333 | 52      | 42.3333 | 32.6667 | 42.3333 | 32.6667 |
| 43 | NIFA-Aman      | 99      | 90      | 99      | 59.6667 | 70.3333 | 58.6667 | 42.6667 | 45.6667 | 34      | 30      | 42.3333 | 23      |
| 44 | Gold-16        | 86      | 99      | 86      | 56.6667 | 70      | 55.3333 | 42.3333 | 54      | 44.6667 | 32.3333 | 41.3333 | 36      |
| 45 | Johar-16       | 95.3333 | 98.3333 | 95.3333 | 56.6667 | 69.3333 | 56.3333 | 47.3333 | 50.3333 | 46.6667 | 32.3333 | 43.3333 | 36      |
| 46 | Ihsan-16       | 86.6667 | 99.6667 | 86.6667 | 54.3333 | 66.3333 | 55      | 42      | 52.3333 | 46.3333 | 36.3333 | 44.3333 | 35.3333 |
| 47 | Fatehjang-16   | 99      | 98.6667 | 84      | 51.6667 | 67.3333 | 54      | 41.3333 | 55      | 43      | 38.6667 | 44.3333 | 33.3333 |
| 48 | NN-Gandum1     | 87      | 99      | 87      | 56.6667 | 74.6667 | 55.6667 | 40      | 58      | 35.6667 | 34.3333 | 46.6667 | 34      |
| 49 | Wardan-17      | 82      | 88.3333 | 82      | 54.6667 | 72.3333 | 56      | 42.3333 | 55      | 35      | 33.3333 | 43.3333 | 32.3333 |
| 50 | Pasina17       | 72.3333 | 99      | 72.3333 | 57      | 58      | 54.6667 | 44.6667 | 42      | 38.3333 | 33.3333 | 47.3333 | 28.6667 |

Table S3 : Mean *in vitro* pollen germination (%) at 0D, 1D, 3D and 6D

| S.NO | Genotypes       | 0D          |         |         | 1D      |         |         | 3D      |         |         | 6D      |         |       |
|------|-----------------|-------------|---------|---------|---------|---------|---------|---------|---------|---------|---------|---------|-------|
|      |                 | 22°C        | 4°C     | -20°C   | 22°C    | 4°C     | -20°C   | 22°C    | 4°C     | -20°C   | 22°C    | 4°C     | -20°C |
| 1    | Saddiq-21       | 80.33333333 | 78      | 84      | 54      | 52.6667 | 34.6667 | 31.6667 | 33.6667 | 32.6667 | 0       | 9.66667 | 0     |
| 2    | Pari-73         | 80          | 72.6667 | 76.3333 | 55.6667 | 65.3333 | 45      | 32      | 34.6667 | 25.3333 | 3       | 11.6667 | 0     |
| 3    | Pak-81          | 81.66666667 | 76.6667 | 68      | 55.6667 | 66.3333 | 58      | 31      | 34      | 28      | 3.66667 | 10      | 0     |
| 4    | C-250           | 84.66666667 | 75      | 84.6667 | 55.6667 | 53.3333 | 40      | 33.6667 | 45      | 27.6667 | 4.33333 | 11.6667 | 0     |
| 5    | Dilkash         | 82          | 73.3333 | 69.3333 | 45      | 53.6667 | 56.6667 | 30      | 35.3333 | 31.3333 | 3.33333 | 8.66667 | 0     |
| 6    | MH-21           | 84          | 69      | 81.3333 | 55.6667 | 53.6667 | 43.6667 | 27.6667 | 45      | 32.6667 | 0       | 11.6667 | 0     |
| 7    | Nawab-21        | 72          | 69.6667 | 80      | 50      | 54      | 56      | 33.3333 | 45      | 33      | 4       | 0       | 0     |
| 8    | Punjab-76       | 75.33333333 | 85.6667 | 82.6667 | 46      | 68      | 54.3333 | 31.6667 | 44      | 32.3333 | 0       | 0       | 0     |
| 9    | Anaj-2017       | 86          | 86      | 71.6667 | 55.3333 | 55      | 58      | 36      | 23      | 34      | 2.33333 | 7.33333 | 0     |
| 10   | Fakhr-e-Bhakkar | 78.66666667 | 84      | 82      | 50.6667 | 67.6667 | 54.3333 | 35.3333 | 21.6667 | 34      | 4.66667 | 0       | 0     |
| 11   | Barani-17       | 80.33333333 | 88      | 83.3333 | 58.6667 | 65.3333 | 58      | 33      | 25.6667 | 33.3333 | 0       | 0       | 0     |
| 12   | Bhakkar star    | 78.66666667 | 98.6667 | 88      | 53.6667 | 66.3333 | 54.6667 | 34      | 35      | 33.3333 | 3       | 0       | 0     |
| 13   | Markaz-2019     | 81          | 98.3333 | 90.3333 | 51.3333 | 68.6667 | 55      | 30.3333 | 36.3333 | 30      | 0       | 7.66667 | 0     |
| 14   | NIFA- Awaz      | 85.66666667 | 88      | 72      | 55      | 65.6667 | 52      | 32      | 21.6667 | 19.6667 | 4       | 11.6667 | 0     |
| 15   | Faheem-19       | 81.66666667 | 98.6667 | 66.3333 | 45.3333 | 65      | 56.3333 | 31.6667 | 32.6667 | 25.6667 | 0       | 8.66667 | 0     |
| 16   | Ghazi-2019      | 83.66666667 | 86.3333 | 70.6667 | 57.3333 | 66.6667 | 53      | 35.6667 | 31.6667 | 22      | 0       | 0       | 0     |
| 17   | NIA-Zakheera    | 85.66666667 | 98.3333 | 64.3333 | 55.6667 | 68      | 57.6667 | 32      | 33      | 25.3333 | 0       | 0       | 0     |
| 18   | NIA-Shaheen     | 85          | 88.6667 | 73.6667 | 53.3333 | 66.6667 | 56.6667 | 29.6667 | 34.3333 | 24.6667 | 0       | 8.33333 | 0     |
| 19   | Akber-19        | 80.33333333 | 96.3333 | 85.6667 | 56.6667 | 66      | 55      | 33      | 21      | 22.3333 | 0       | 6       | 0     |
| 20   | Gulzar-19       | 77          | 94.6667 | 63      | 56.3333 | 68.3333 | 56.6667 | 32      | 24      | 21.6667 | 0       | 9.33333 | 0     |
| 21   | Pirsbak-19      | 85.66666667 | 98.3333 | 86      | 55.3333 | 67.3333 | 55      | 38.6667 | 33.3333 | 37      | 0       | 10.6667 | 0     |
| 22   | Morocco         | 77          | 97.3333 | 87.6667 | 52      | 66.3333 | 52      | 37.6667 | 43.6667 | 36      | 0       | 0       | 0     |
| 23   | Aghaz           | 84.33333333 | 98.6667 | 87.3333 | 58.6667 | 67.3333 | 54.3333 | 32.6667 | 44      | 33      | 0       | 10.6667 | 0     |
| 24   | Khoshn          | 73.33333333 | 95.3333 | 87.6667 | 53.6667 | 46.3333 | 58      | 34.3333 | 32.3333 | 33.3333 | 0       | 7       | 0     |
| 25   | AZRC            | 82          | 98.6667 | 88      | 51.3333 | 66.3333 | 54.6667 | 29      | 35      | 27      | 0       | 7.33333 | 0     |
| 26   | Umeed-e-Khas    | 82.66666667 | 96.3333 | 82.6667 | 44      | 65.3333 | 44      | 18      | 32.3333 | 27      | 5       | 8.33333 | 0     |

|      |                |             |          |          |          |          |          |         |          |         |          |          |          |
|------|----------------|-------------|----------|----------|----------|----------|----------|---------|----------|---------|----------|----------|----------|
| 27   | WL 711         | 86.66666667 | 98.6667  | 72.6667  | 53.3333  | 68       | 56.3333  | 29.3333 | 31.3333  | 27.6667 | 0        | 14       | 4.66667  |
| 28   | Pirsbak-13     | 81.66666667 | 97.3333  | 86.3333  | 57.3333  | 49.3333  | 52.6667  | 23.6667 | 35.6667  | 32.6667 | 0        | 9.33333  | 2        |
| 29   | Hamal-Faqir    | 85          | 98.3333  | 82       | 55.6667  | 46.6667  | 57       | 28      | 23.6667  | 27      | 0        | 0        | 4        |
| 30   | Pakistan-2013  | 82.66666667 | 96.3333  | 85.3333  | 56.6667  | 67       | 54       | 27      | 32       | 25      | 0        | 8.66667  | 3.66667  |
| 31   | NIFA-Lilma     | 81          | 98.3333  | 72.6667  | 56.6667  | 68       | 57       | 30.3333 | 31.3333  | 28.6667 | 0        | 7        | 4.66667  |
| 32   | Galaxy-2013    | 84.66666667 | 97       | 85.3333  | 56.3333  | 68       | 58       | 18      | 34       | 30.6667 | 0        | 9.33333  | 2.66667  |
| 33   | Shalakot-13    | 81.33333333 | 98.6667  | 79.6667  | 56       | 66.6667  | 54.6667  | 34.6667 | 33.3333  | 23      | 0        | 9.66667  | 4        |
| 34   | Umeed-2014     | 85.66666667 | 96.6667  | 91       | 53       | 66       | 39.3333  | 22      | 35.3333  | 33.6667 | 1.66667  | 7        | 0        |
| 35   | Pakhtunkhwa-15 | 77          | 88.3333  | 87       | 58       | 68.3333  | 43.6667  | 31.3333 | 37       | 30.6667 | 0        | 7.33333  | 4.66667  |
| 36   | Pirsbak-15     | 87          | 87.3333  | 84       | 55       | 67       | 45.6667  | 32.6667 | 23       | 31.3333 | 3.66667  | 0        | 0        |
| 37   | Ujala-15       | 76.33333333 | 88.6667  | 73       | 58.6667  | 66.3333  | 36.6667  | 30      | 38.6667  | 27.3333 | 0        | 11.6667  | 0        |
| 38   | IBGE-Ghaneemat | 87.66666667 | 88.3333  | 87       | 44       | 67.3333  | 45       | 29.6667 | 32       | 32.6667 | 3.66667  | 9.33333  | 0        |
| 39   | NIFA-Insaf     | 84.33333333 | 96.6667  | 86       | 53.6667  | 61.6667  | 54.3333  | 34.3333 | 35       | 22.3333 | 0        | 9.66667  | 0        |
| 40   | Sindhu-16      | 78.66666667 | 94.3333  | 74.6667  | 44       | 63.6667  | 58       | 34.6667 | 36.3333  | 34.6667 | 3.33333  | 11.3333  | 0        |
| 41   | Zincol         | 81.33333333 | 87.3333  | 70       | 56.3333  | 65       | 54.6667  | 37      | 32       | 42      | 0        | 0        | 4        |
| 42   | Boroloug-16    | 81.66666667 | 88       | 76.3333  | 53.3333  | 68       | 43.6667  | 22      | 38       | 37      | 2.66667  | 0        | 3.66667  |
| 43   | NIFA-Aman      | 76.66666667 | 88.6667  | 88       | 46       | 67.6667  | 44       | 32      | 22       | 47.3333 | 4        | 9.66667  | 0        |
| 44   | Gold-16        | 76          | 98.6667  | 84       | 58.6667  | 66.3333  | 44       | 34.3333 | 24.6667  | 34.3333 | 0        | 13       | 3        |
| 45   | Johar-16       | 75.66666667 | 88.6667  | 87.6667  | 55       | 54.6667  | 44       | 13.3333 | 38       | 31      | 0        | 0        | 0        |
| 46   | Ihsan-16       | 77.66666667 | 74.6667  | 84.3333  | 53.6667  | 54       | 37.3333  | 32      | 25.3333  | 23      | 1.66667  | 12       | 5        |
| 47   | Fatehjang-16   | 86          | 75.3333  | 81       | 43.3333  | 67       | 58       | 18      | 22       | 23      | 1.66667  | 13.3333  | 0        |
| 48   | NN-Gandum1     | 87          | 75.3333  | 85.6667  | 56.3333  | 54.3333  | 44       | 28      | 31.6667  | 32.3333 | 0        | 0        | 3        |
| 49   | Wardan-17      | 81.66666667 | 70.3333  | 80       | 53.3333  | 66       | 44       | 15.6667 | 32       | 33      | 0        | 11.6667  | 4.66667  |
| 50   | Pasina17       | 70          | 71       | 75       | 43.3333  | 63       | 34       | 35      | 22       | 35.3333 | 0        | 12.3333  | 0        |
| Mean |                | 81.24       | 88.67333 | 80.30667 | 53.19333 | 63.10667 | 50.67333 | 30.18   | 32.47333 | 30.16   | 1.193333 | 7.053333 | 1.073333 |

Table S4: Mean grains per spike (GpS)

| S.NO | Genotypes    | Average of GpS |
|------|--------------|----------------|
| 1    | Saddiq-21    | 49.7           |
| 2    | Pari-73      | 35.0           |
| 3    | Pak-81       | 46.0           |
| 4    | C-250        | 30.0           |
| 5    | Dilkash      | 40.7           |
| 6    | MH-21        | 44.7           |
| 7    | Nawab-21     | 36.7           |
| 8    | Punjab-76    | 40.7           |
| 9    | Anaj-2017    | 56.0           |
|      | Fakhr-e-     |                |
| 10   | Bhakkar      | 35.0           |
| 11   | Barani-17    | 31.7           |
| 12   | Bhakkar star | 42.0           |
| 13   | Markaz-2019  | 32.0           |
| 14   | NIFA- Awaz   | 52.0           |
| 15   | Faheem-19    | 38.3           |
| 16   | Ghazi-2019   | 41.3           |
| 17   | NIA-Zakheera | 38.3           |
| 18   | NIA-Shaheen  | 46.7           |
| 19   | Akber-19     | 35.3           |
| 20   | Gulzar-19    | 40.3           |
| 21   | Pirsbak-19   | 48.0           |
| 22   | Morocco      | 37.0           |
| 23   | Aghaz        | 43.0           |
| 24   | Khoshn       | 35.0           |

|    |                            |      |
|----|----------------------------|------|
| 25 | AZRC                       | 45.3 |
| 26 | Umeed-e-Khas               | 53.7 |
| 27 | WL 711                     | 60.0 |
| 28 | Pirsbak-13                 | 58.0 |
| 29 | Hamal-Faqir                | 55.7 |
| 30 | Pakistan-2013              | 35.0 |
| 31 | NIFA-Lilma                 | 42.0 |
| 32 | Galaxy-2013                | 34.3 |
| 33 | Shalakot-13                | 46.0 |
| 34 | Umeed-2014<br>Pakhtunkhwa- | 53.3 |
| 35 | 15                         | 54.0 |
| 36 | Pirsbak-15                 | 53.0 |
| 37 | Ujala-15<br>IBGE-          | 34.0 |
| 38 | Ghaneemat                  | 39.0 |
| 39 | NIFA-Insaf                 | 45.0 |
| 40 | Sindhu-16                  | 35.7 |
| 41 | Zincol                     | 37.0 |
| 42 | Boroloug-16                | 44.3 |
| 43 | NIFA-Aman                  | 54.3 |
| 44 | Gold-16                    | 42.0 |
| 45 | Johar-16                   | 43.0 |
| 46 | Ihsan-16                   | 60.0 |
| 47 | Fatehjang-16               | 50.0 |
| 48 | NN-Gandum1                 | 46.0 |
| 49 | Wardan-17                  | 35.7 |
| 50 | Pasina17                   | 29.0 |
